# Supplementary material
Source: PubMed Central journal article supplement (PMC7553867)
Supplement: mmc1.pdf [file mmc1.pdf]

# THE LANCET

## Public Health

### Supplementary appendix

This appendix formed part of the original submission and has been peer reviewed. We post it as supplied by the authors.

Supplement to: Been JV, Ochoa LB, Bertens LCM, Schoenmakers S, Steegers EAP, Reiss IKM. Impact of COVID-19 mitigation measures on the incidence of preterm birth: a national quasi-experimental study. *Lancet Public Health* 2020; published online Oct 13. [https://doi.org/10.1016/S2468-2667\(20\)30223-1](https://doi.org/10.1016/S2468-2667(20)30223-1).

## **APPENDIX**

### **Impact of COVID-19 mitigation measures on the incidence of preterm birth: a national quasi-experimental study**

Jasper V Been, Lizbeth Burgos Ochoa, Loes CM Bertens, Sam Schoenmakers, Eric AP Steegers, Irwin KM Reiss

# COVID-19: Government Response Stringency Index

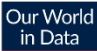

This is a composite measure based on nine response indicators including school closures, workplace closures, and travel bans, rescaled to a value from 0 to 100 (100 = strictest). If policies vary at the subnational level, the index is shown as the response level of the strictest sub-region.

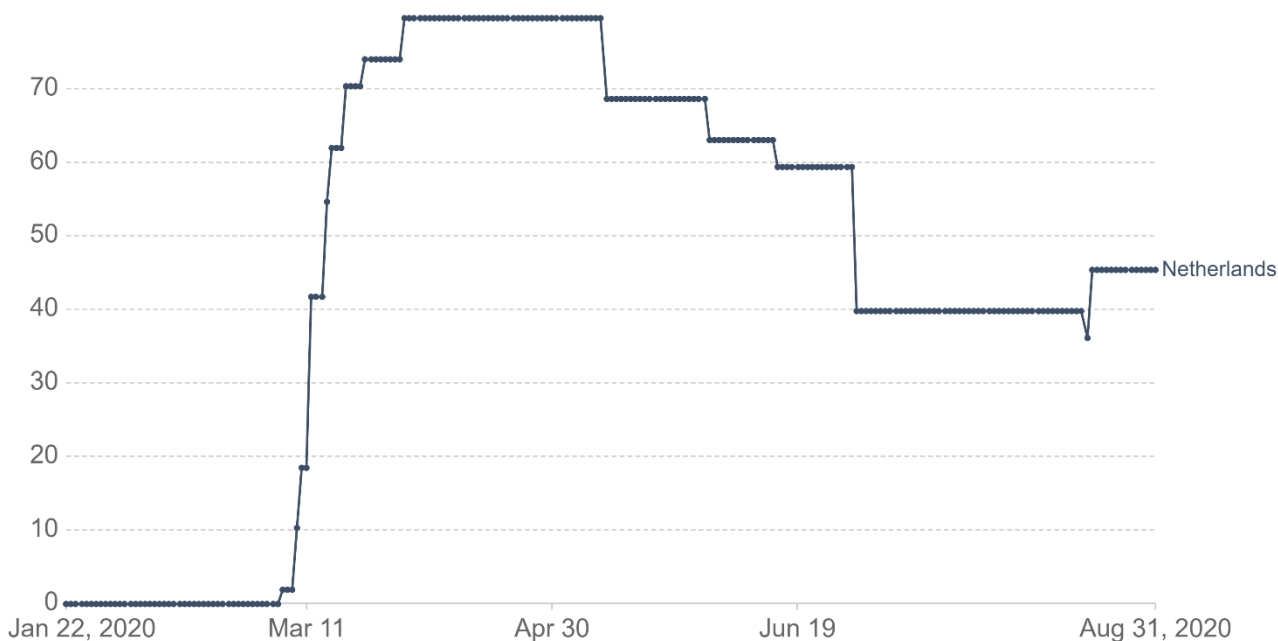

Source: Hale, Webster, Petherick, Phillips, and Kira (2020). Oxford COVID-19 Government Response Tracker – Last updated 2 September, 12:30 (London time)  
Note: This index simply records the number and strictness of government policies, and should not be interpreted as 'scoring' the appropriateness or effectiveness of a country's response.  
OurWorldInData.org/coronavirus • CC BY

## SUPPLEMENTAL FIGURE 1. TEMPORAL PATTERNING OF THE COVID-19 GOVERNMENT RESPONSE STRINGENCY INDEX IN THE NETHERLANDS

# Assignment variable frequency

Cut-offs at 09-03-2020, 15-03-2020, and 23-03-2020

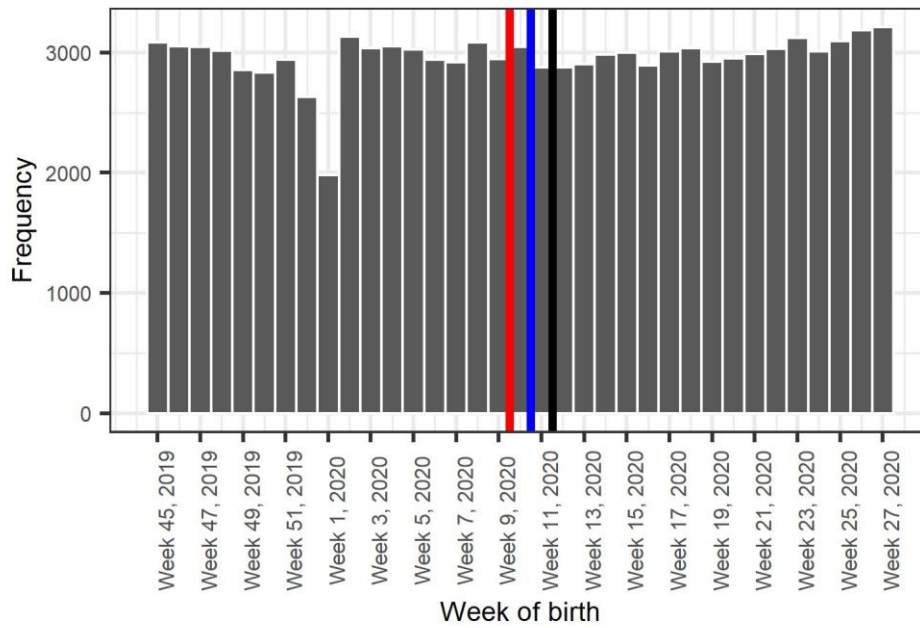

**SUPPLEMENTAL FIGURE 2. HISTOGRAM OF ASSIGNMENT VARIABLE, DEMONSTRATING THAT WEEK OF BIRTH IS CONTINUOUS NEAR CUT-OFF VALUES AND NOT AFFECTED BY THE COVID-19 MITIGATION MEASURES**

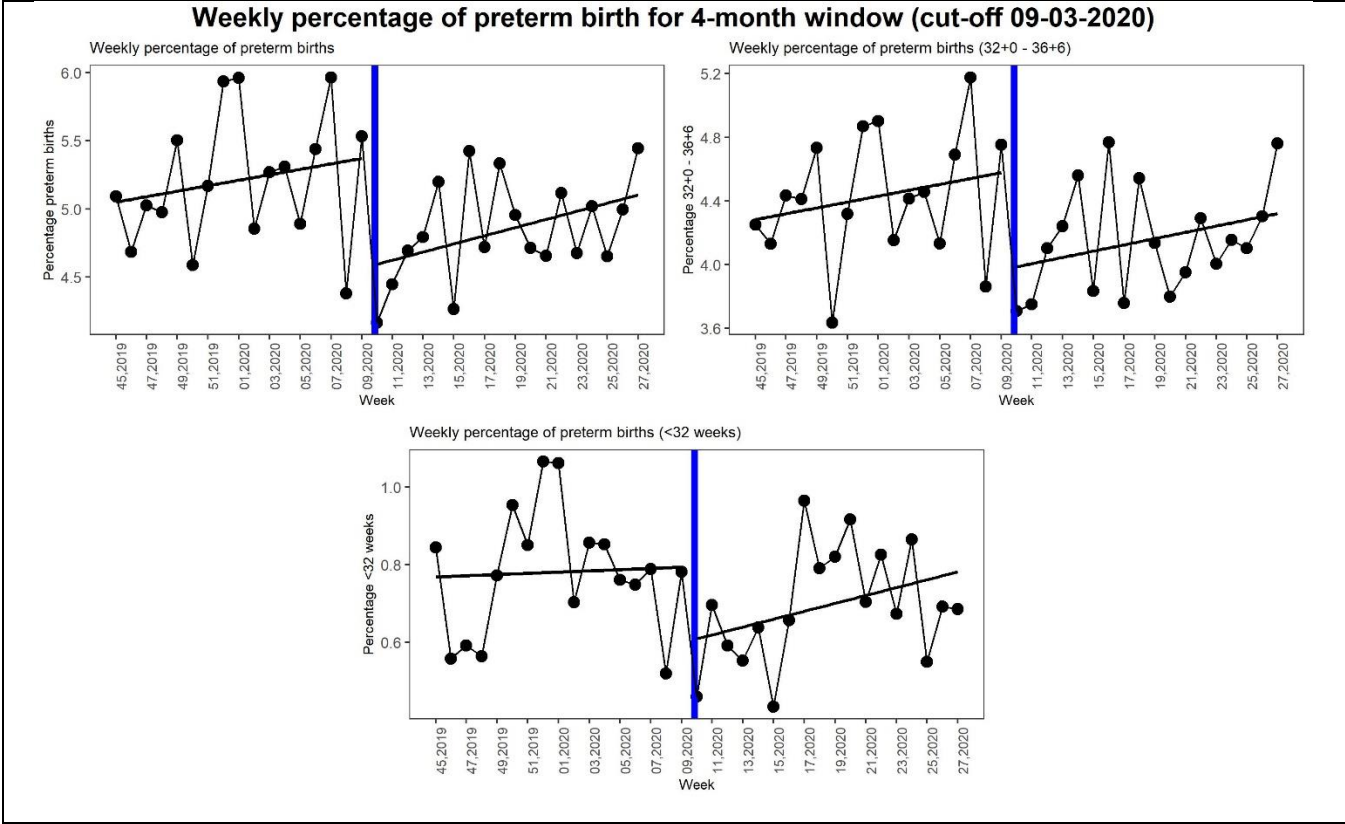

**SUPPLEMENTAL FIGURE 3. WEEKLY PERCENTAGE OF PRETERM BIRTH FOR 4-MONTH WINDOW PLOTTED AGAINST ASSIGNMENT VARIABLE (WEEK OF BIRTH) TO SHOW DISCONTINUITY AT CUT-OFF VALUE (09-03-2020)**

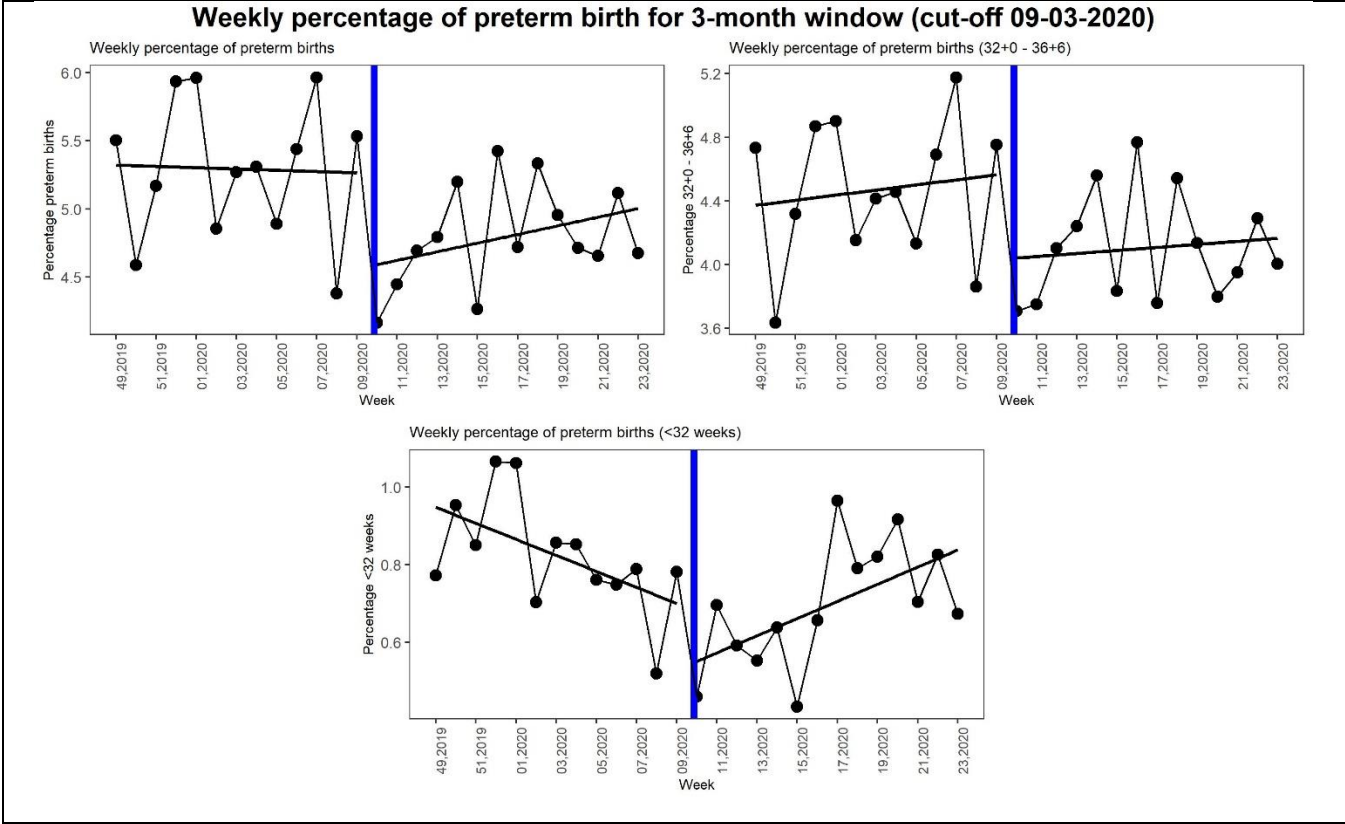

**SUPPLEMENTAL FIGURE 4. WEEKLY PERCENTAGE OF PRETERM BIRTH FOR 3-MONTH WINDOW PLOTTED AGAINST ASSIGNMENT VARIABLE (WEEK OF BIRTH) TO SHOW DISCONTINUITY AT CUT-OFF VALUE (09-03-2020)**

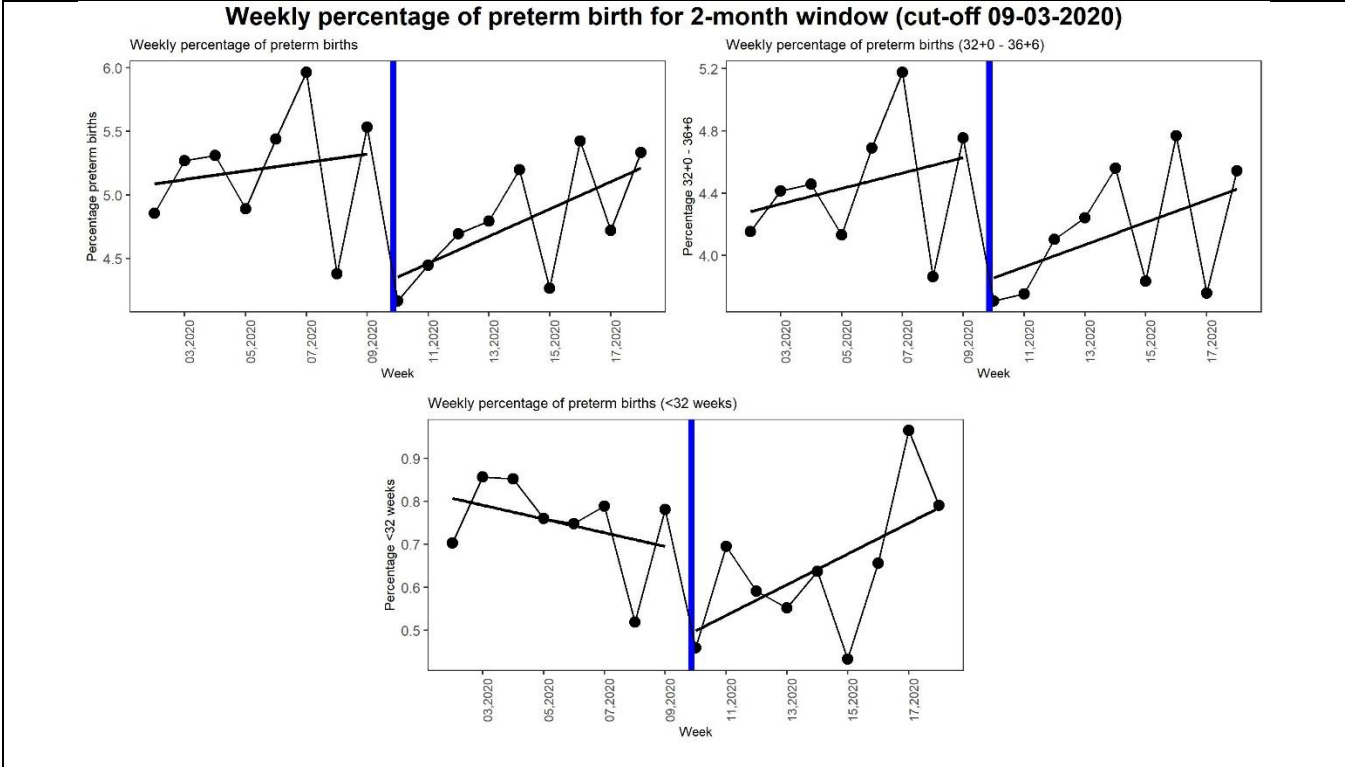

**SUPPLEMENTAL FIGURE 5. WEEKLY PERCENTAGE OF PRETERM BIRTH FOR 2-MONTH WINDOW PLOTTED AGAINST ASSIGNMENT VARIABLE (WEEK OF BIRTH) TO SHOW DISCONTINUITY AT CUT-OFF VALUE (09-03-2020)**

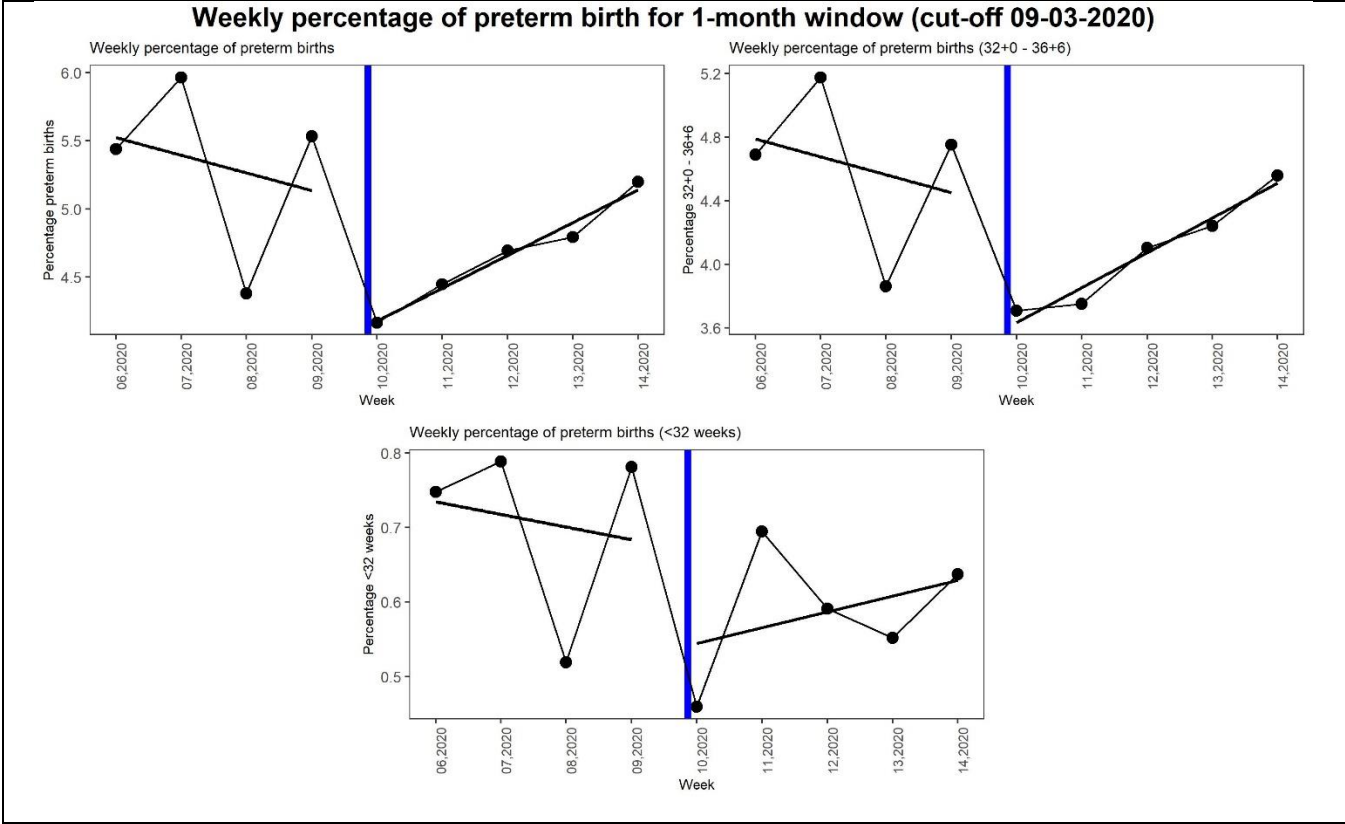

**SUPPLEMENTAL FIGURE 6. WEEKLY PERCENTAGE OF PRETERM BIRTH FOR 1-MONTH WINDOW PLOTTED AGAINST ASSIGNMENT VARIABLE (WEEK OF BIRTH) TO SHOW DISCONTINUITY AT CUT-OFF VALUE (09-03-2020)**



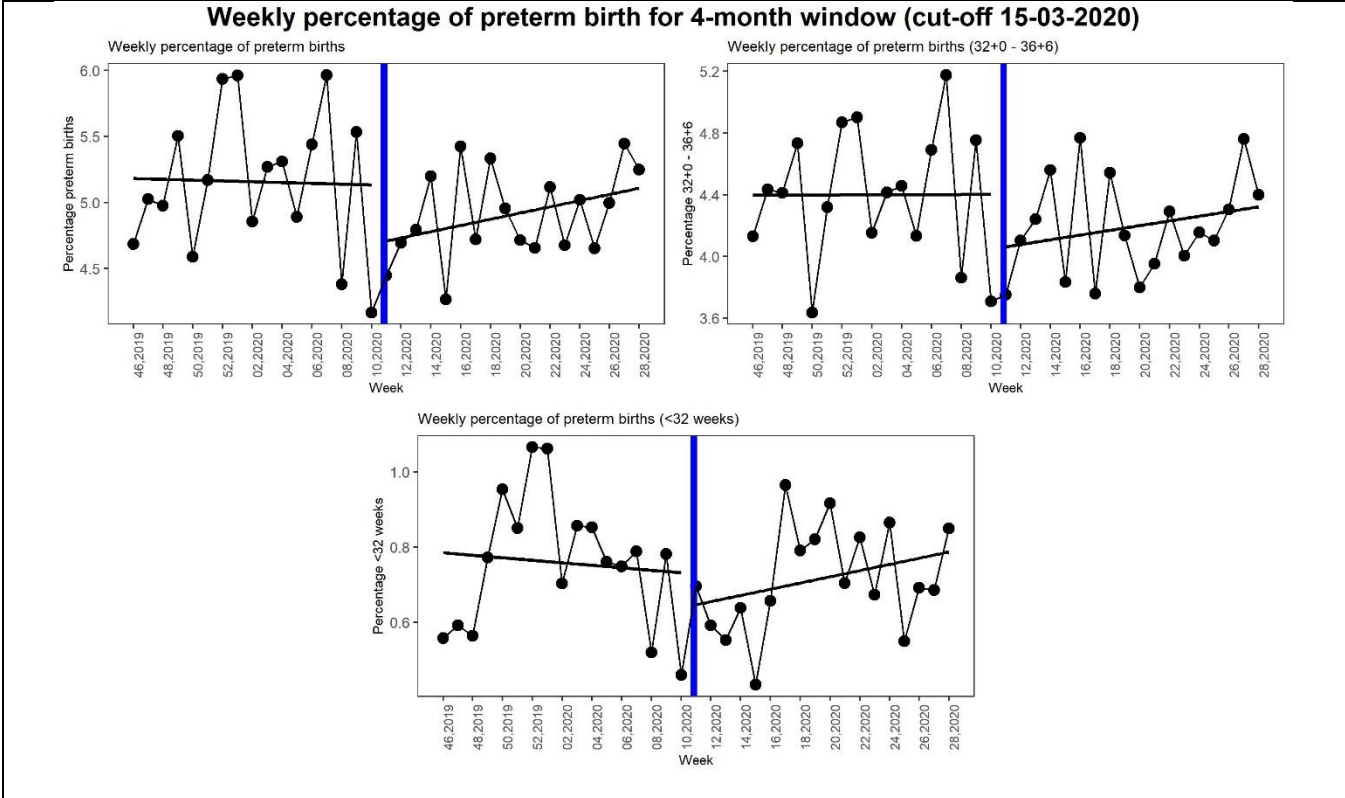

**SUPPLEMENTAL FIGURE 7. WEEKLY PERCENTAGE OF PRETERM BIRTH FOR 4-MONTH WINDOW PLOTTED AGAINST ASSIGNMENT VARIABLE (WEEK OF BIRTH) TO SHOW DISCONTINUITY AT CUT-OFF VALUE (15-03-2020)**

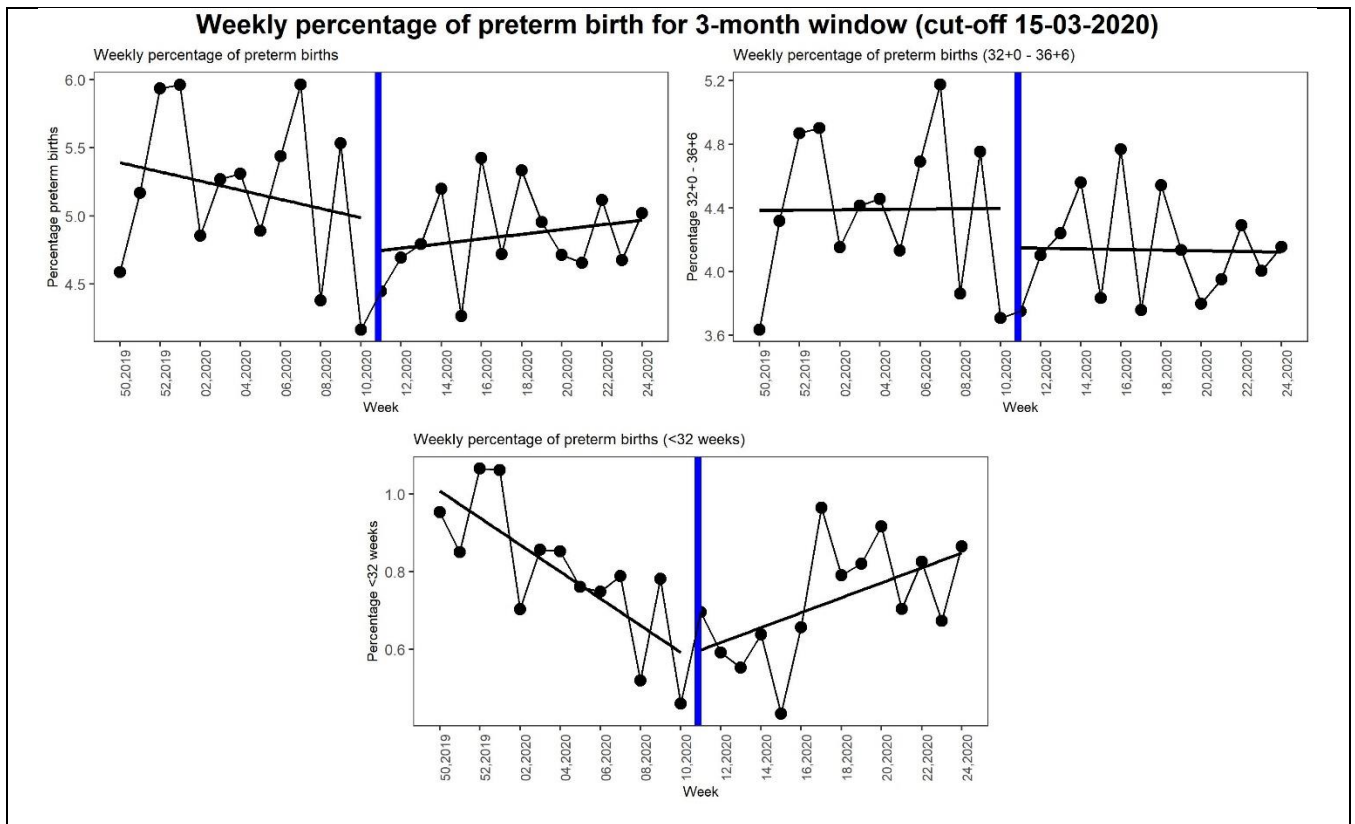

**SUPPLEMENTAL FIGURE 8. WEEKLY PERCENTAGE OF PRETERM BIRTH FOR 3-MONTH WINDOW PLOTTED AGAINST ASSIGNMENT VARIABLE (WEEK OF BIRTH) TO SHOW DISCONTINUITY AT CUT-OFF VALUE (15-03-2020)**

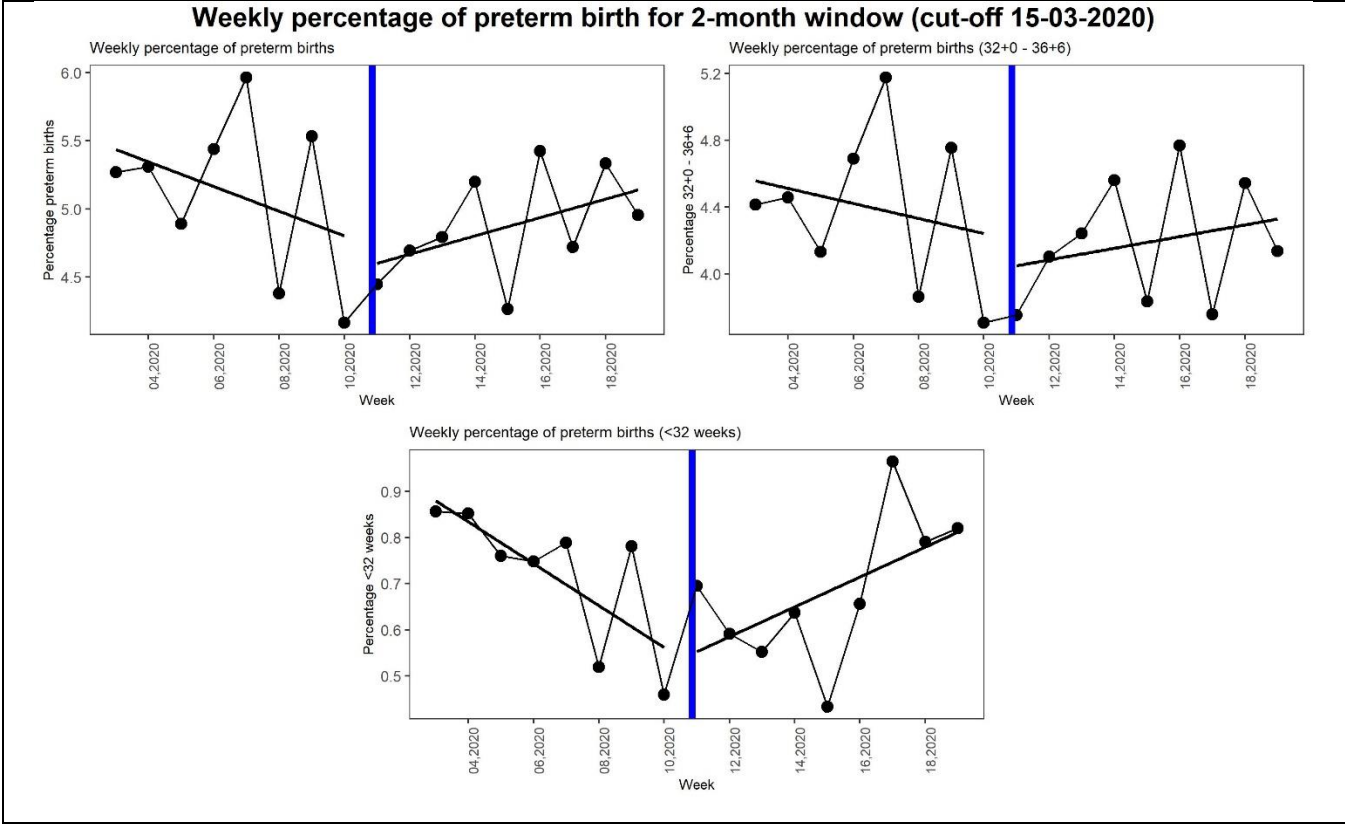

**SUPPLEMENTAL FIGURE 9. WEEKLY PERCENTAGE OF PRETERM BIRTH FOR 2-MONTH WINDOW PLOTTED AGAINST ASSIGNMENT VARIABLE (WEEK OF BIRTH) TO SHOW DISCONTINUITY AT CUT-OFF VALUE (15-03-2020)**

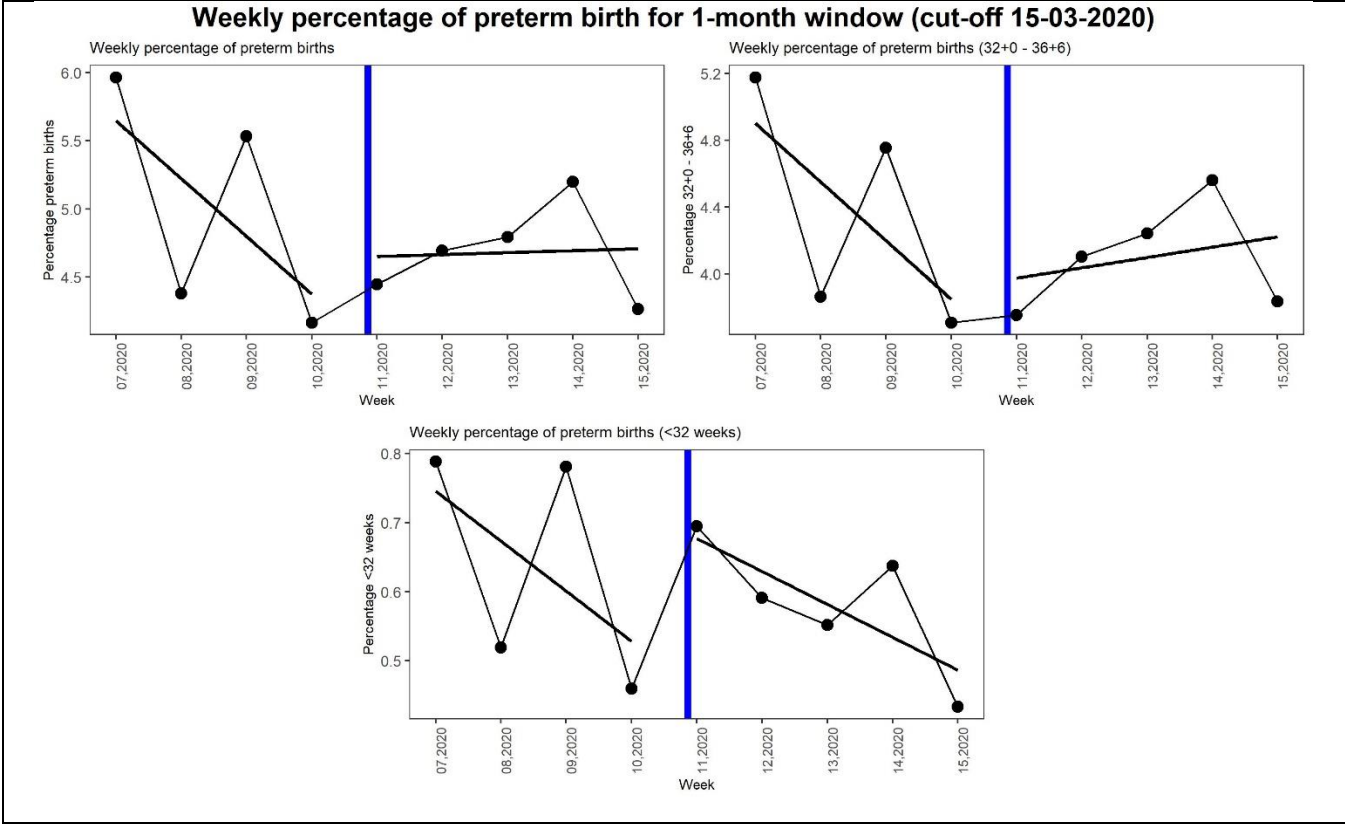

**SUPPLEMENTAL FIGURE 10. WEEKLY PERCENTAGE OF PRETERM BIRTH FOR 1-MONTH WINDOW PLOTTED AGAINST ASSIGNMENT VARIABLE (WEEK OF BIRTH) TO SHOW DISCONTINUITY AT CUT-OFF VALUE (15-03-2020)**

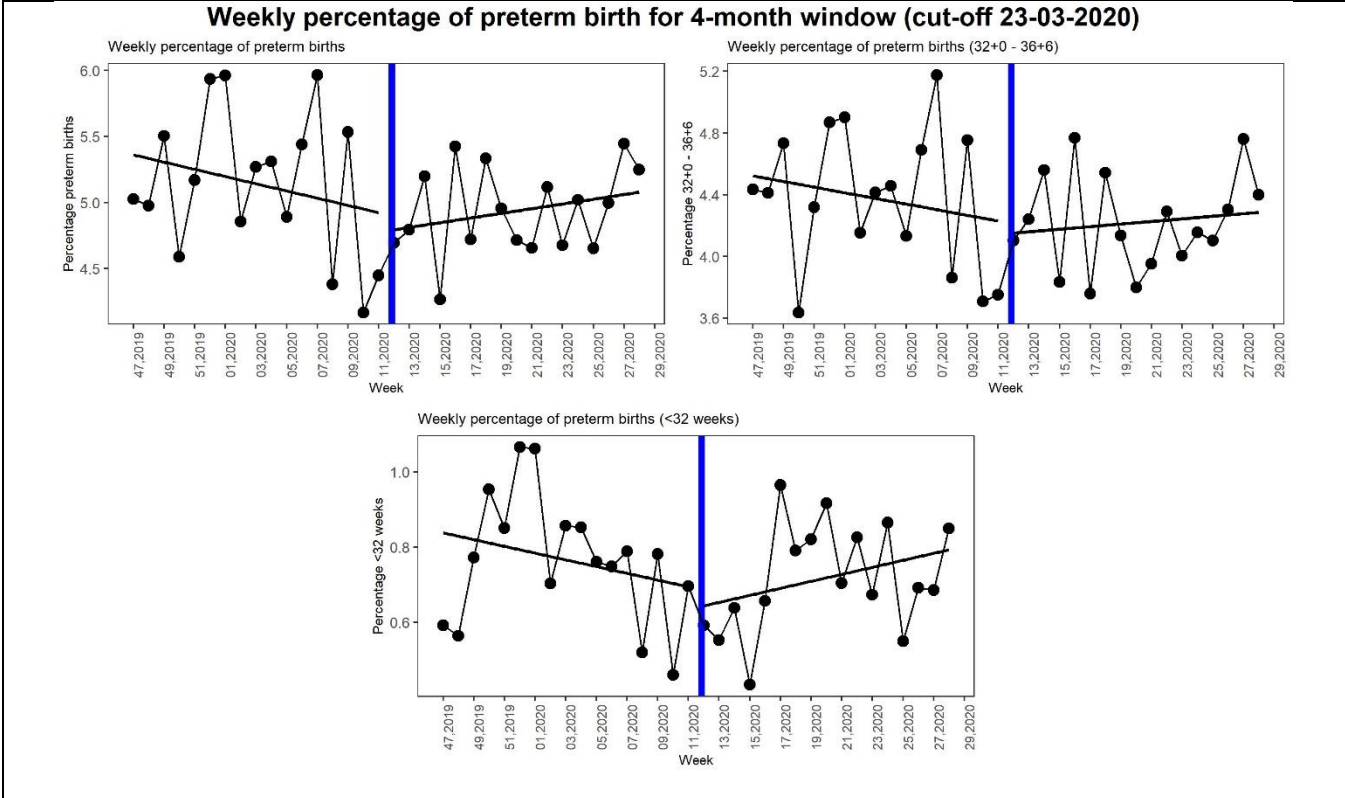

**SUPPLEMENTAL FIGURE 11. WEEKLY PERCENTAGE OF PRETERM BIRTH FOR 4-MONTH WINDOW PLOTTED AGAINST ASSIGNMENT VARIABLE (WEEK OF BIRTH) TO SHOW DISCONTINUITY AT CUT-OFF VALUE (23-03-2020)**

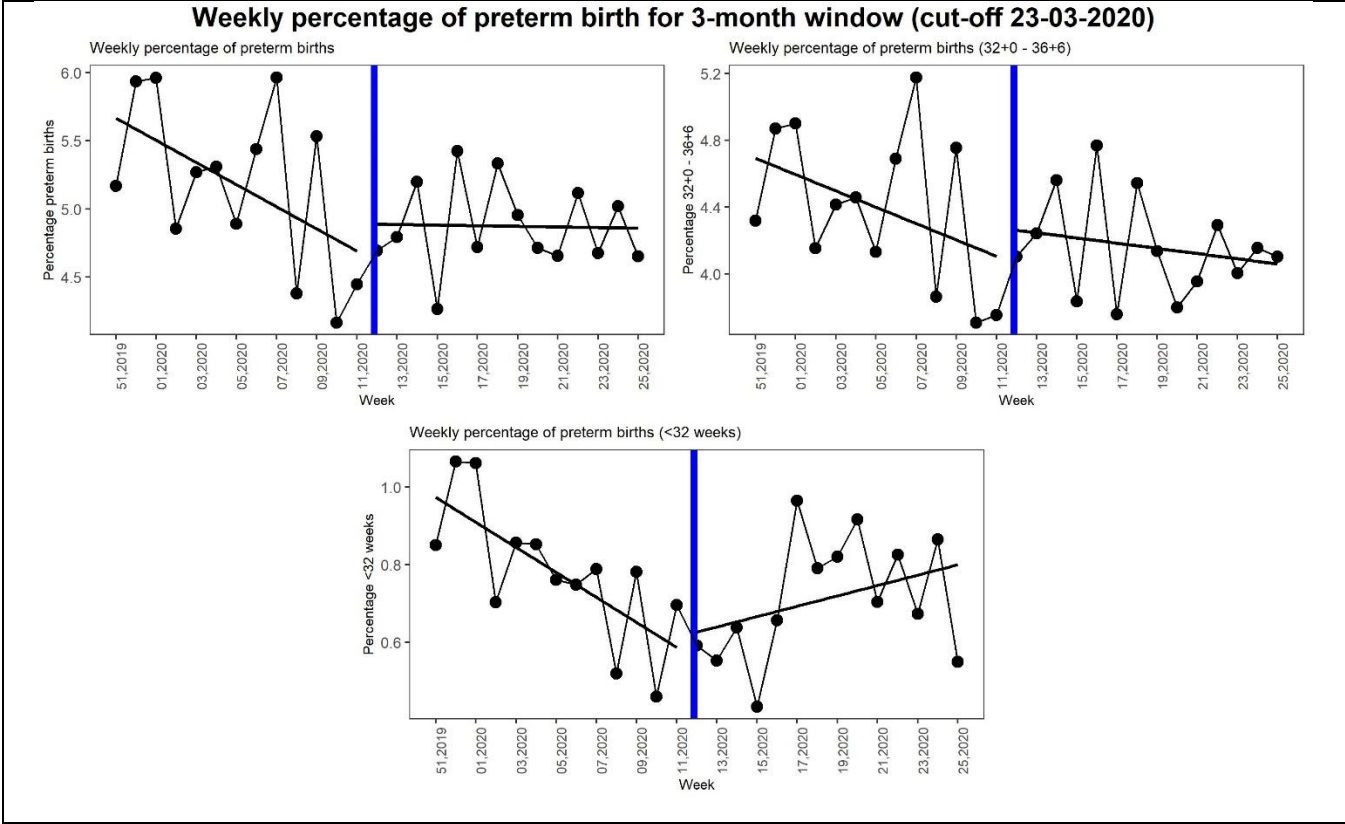

**SUPPLEMENTAL FIGURE 12. WEEKLY PERCENTAGE OF PRETERM BIRTH FOR 3-MONTH WINDOW PLOTTED AGAINST ASSIGNMENT VARIABLE (WEEK OF BIRTH) TO SHOW DISCONTINUITY AT CUT-OFF VALUE (23-03-2020)**

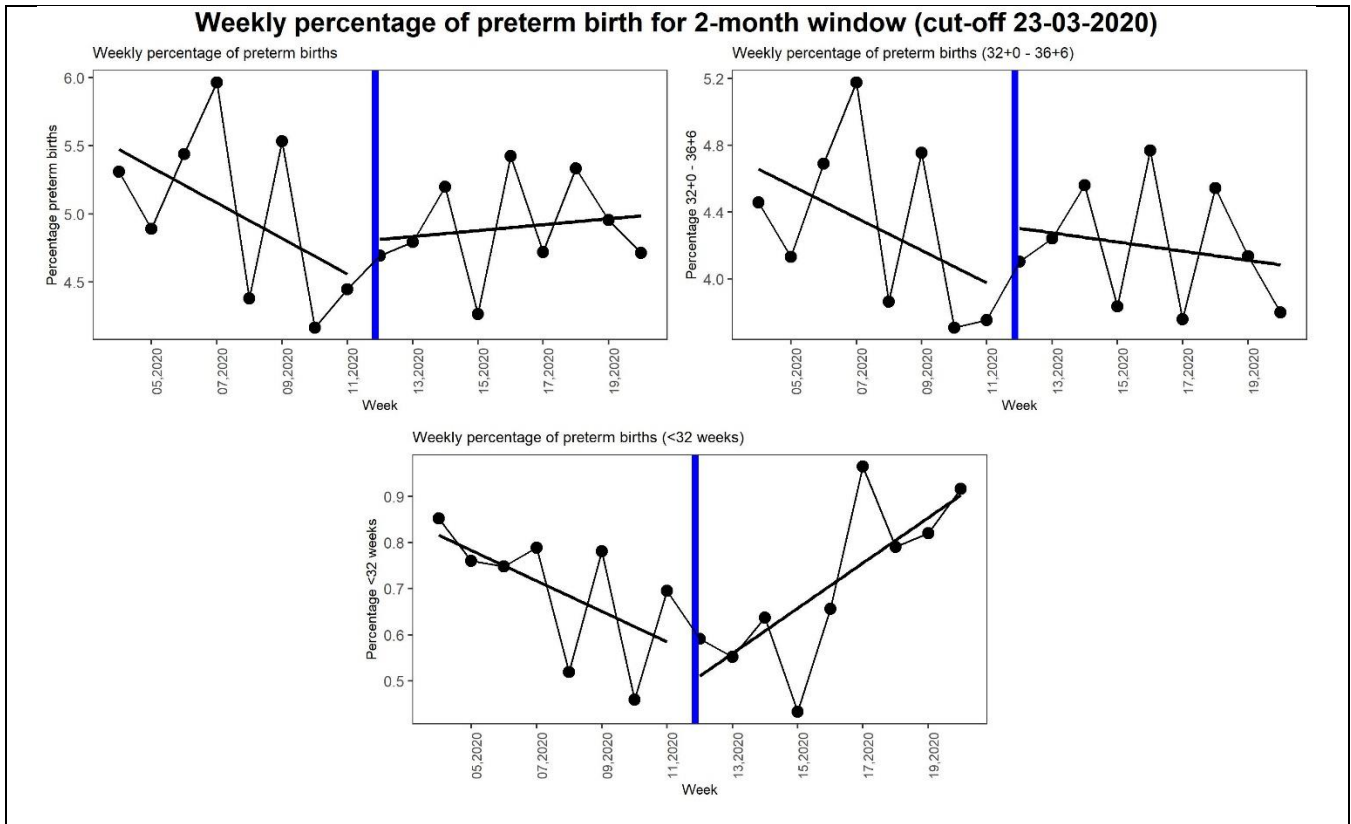

**SUPPLEMENTAL FIGURE 13. WEEKLY PERCENTAGE OF PRETERM BIRTH FOR 2-MONTH WINDOW PLOTTED AGAINST ASSIGNMENT VARIABLE (WEEK OF BIRTH) TO SHOW DISCONTINUITY AT CUT-OFF VALUE (23-03-2020)**

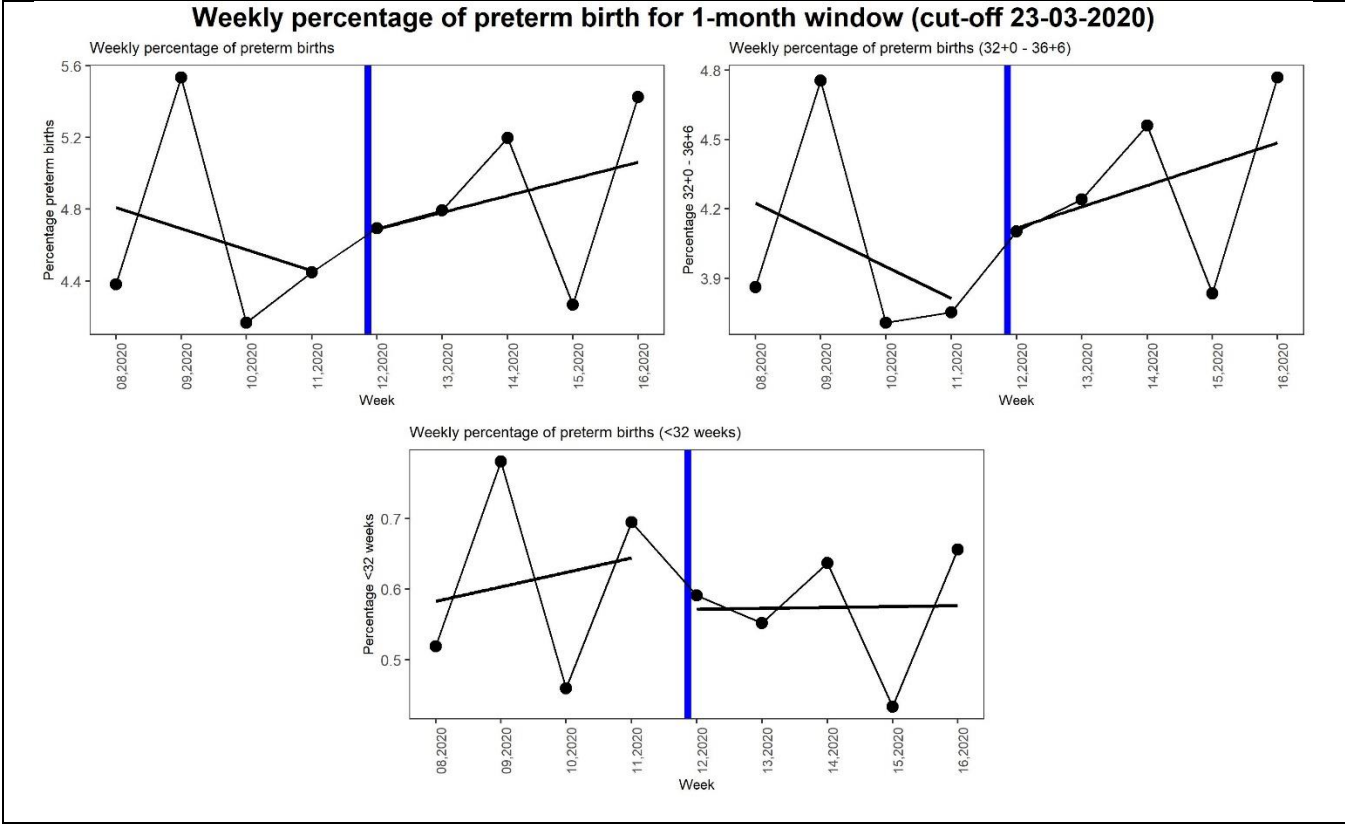

**SUPPLEMENTAL FIGURE 14. WEEKLY PERCENTAGE OF PRETERM BIRTH FOR 1-MONTH WINDOW PLOTTED AGAINST ASSIGNMENT VARIABLE (WEEK OF BIRTH) TO SHOW DISCONTINUITY AT CUT-OFF VALUE (23-03-2020)**



**SUPPLEMENTAL TABLE 1: VALIDATION OF ANNUAL POPULATION CHARACTERISTICS AGAINST PERINED FOR SELECTED YEARS**

| Characteristic (n(%))           | 2011             |                  | 2014             |                  | 2017             |                  |
|---------------------------------|------------------|------------------|------------------|------------------|------------------|------------------|
|                                 | Praeventis       | Perined          | Praeventis       | Perined          | Praeventis       | Perined          |
| <b>Gestational age</b>          | <b>n=173,965</b> | <b>n=172,453</b> | <b>n=169,375</b> | <b>n=169,225</b> | <b>n=164,478</b> | <b>n=160,818</b> |
| 24+0 – 31+6 weeks               | 1,223 (0.7)      | 1,512 (0.9)      | 1,236 (0.7)      | 1,515 (0.9)      | 1,139 (0.7)      | 1,345 (0.8)      |
| 32+0 – 36+6 weeks               | 8,081 (4.6)      | 8,221 (4.8)      | 7,772 (4.6)      | 7,883 (4.7)      | 7,218 (4.4)      | 7,363 (4.6)      |
| 37+0 – 41+6 weeks               | 161,070 (92.6)   | 157,565 (91.4)   | 157,523 (93.0)   | 154,998 (91.6)   | 153,196 (93.1)   | 149,493 (93.0)   |
| ≥42+0 weeks                     | 3,107 (1.8)      | 3,022 (1.8)      | 2,285 (1.3)      | 2,213 (1.3)      | 2,287 (1.4)      | 2,316 (1.4)      |
| missing                         | 484 (0.3)        | 2,115 (1.2)      | 559 (0.3)        | 2,646 (1.6)      | 638 (0.4)        | 301 (0.2)        |
| <b>Birth weight<sup>a</sup></b> | <b>n=173,965</b> | <b>n=172,886</b> | <b>n=169,375</b> | <b>n=169,673</b> | <b>n=164,478</b> | <b>n=161,232</b> |
| <1500 grams                     | 1,054 (0.6)      | 1,801 (1.1)      | 1,079 (0.6)      | 1,812 (1.0)      | 1,059 (0.6)      | 1,525 (1.0)      |
| 1500 – 2499 grams               | 6,299 (3.6)      | 6,613 (3.8)      | 6,462 (3.8)      | 6,787 (4.0)      | 5,918 (3.6)      | 5,993 (3.7)      |
| 2500 – 3499 grams               | 82,177 (47.2)    | 81,569 (47.2)    | 82,303 (48.6)    | 82,434 (48.6)    | 79,130 (48.1)    | 77,552 (48.1)    |
| 3500 – 3999 grams               | 58,131 (33.5)    | 57,252 (33.1)    | 55,803 (32.9)    | 55,267 (32.6)    | 55,247 (33.6)    | 53,837 (33.4)    |
| 4000 – 4499 grams               | 21,551 (12.4)    | 21,167 (12.2)    | 19,986 (11.8)    | 19,845 (11.7)    | 19,400 (11.8)    | 18,939 (11.7)    |
| ≥4500 grams                     | 4,134 (2.4)      | 4,099 (2.4)      | 3,229 (1.9)      | 3,228 (1.9)      | 3,116 (1.9)      | 3,051 (1.9)      |
| missing                         | 437 (0.3)        | 385 (0.2)        | 513 (0.3)        | 300 (0.2)        | 608 (0.4)        | 335 (0.2)        |

Only singleton births at gestational ages  $\geq 24+0$  weeks are included in the comparisons; note that Perined data also include stillbirths. <sup>a</sup>For Perined the birth weight distribution includes births at gestational ages  $\geq 22+0$  weeks instead of  $\geq 24+0$  weeks.

**SUPPLEMENTAL TABLE 2: IMPACT OF THE 9 MARCH COVID-19 MITIGATION MEASURES ON THE INCIDENCE OF PRETERM BIRTH: EFFECT MODIFICATION BY NEIGHBOURHOOD SOCIO-ECONOMIC STATUS**

| Variable                                                | Time window around implementation |                         |                         |                         |
|---------------------------------------------------------|-----------------------------------|-------------------------|-------------------------|-------------------------|
|                                                         | ±1 month<br>OR (95%CI)            | ±2 months<br>OR (95%CI) | ±3 months<br>OR (95%CI) | ±4 months<br>OR (95%CI) |
| <b>COVID-19 mitigation measures</b>                     | 0.74 (0.55–0.99)                  | 0.74 (0.60–0.91)        | 0.85 (0.71–1.01)        | 0.87 (0.73–1.02)        |
| <b>SES</b>                                              |                                   |                         |                         |                         |
| High SES (≥p80)                                         | REF                               | REF                     | REF                     | REF                     |
| Medium SES (p20-80)                                     | 1.10 (1.05–1.15)                  | 1.13 (1.09–1.16)        | 1.11 (1.08–1.14)        | 1.12 (1.09–1.14)        |
| Low SES (<p20)                                          | 1.08 (1.02–1.14)                  | 1.11 (1.07–1.16)        | 1.10 (1.06–1.13)        | 1.12 (1.08–1.15)        |
| <b>COVID-19 mitigation measures × SES (interaction)</b> |                                   |                         |                         |                         |
| High SES                                                | REF                               | REF                     | REF                     | REF                     |
| Medium SES                                              | 1.16 (0.94–1.44)                  | 1.07 (0.91–1.25)        | 1.01 (0.89–1.13)        | 0.98 (0.88–1.09)        |
| Low SES                                                 | 1.17 (0.90–1.52)                  | 1.12 (0.92–1.35)        | 1.01 (0.87–1.18)        | 0.99 (0.87–1.13)        |

OR = odds ratio; CI = confidence interval; SES = socioeconomic status; REF = reference category

Note: the distribution of women across neighbourhood SES categories was similar before and after the lockdown: low SES: before 19.0%, after 18.9%; middle SES: before 61.0%, after 61.0%; high SES: before 20.1%, after 20.2%.

**SUPPLEMENTAL TABLE 3: IMPACT OF THE 9 MARCH COVID-19 MITIGATION MEASURES ON THE INCIDENCE OF PRETERM BIRTH: EFFECT MODIFICATION BY SMALL-FOR-GESTATIONAL-AGE STATUS**

| Variable                                                       | Time window around implementation |                         |                         |                         |
|----------------------------------------------------------------|-----------------------------------|-------------------------|-------------------------|-------------------------|
|                                                                | ±1 month<br>OR (95%CI)            | ±2 months<br>OR (95%CI) | ±3 months<br>OR (95%CI) | ±4 months<br>OR (95%CI) |
| <b>COVID-19 mitigation measures</b>                            | 0.81 (0.63–1.03)                  | 0.76 (0.64–0.90)        | 0.83 (0.71–0.96)        | 0.83 (0.72–0.96)        |
| <b>SGA status</b>                                              |                                   |                         |                         |                         |
| Non SGA                                                        | REF                               | REF                     | REF                     | REF                     |
| SGA                                                            | 2.21 (2.11–2.31)                  | 2.20 (2.13–2.27)        | 2.20 (2.14–2.26)        | 2.20 (2.15–2.24)        |
| <b>COVID-19 mitigation measures × SGA status (interaction)</b> |                                   |                         |                         |                         |
| Non SGA                                                        | REF                               | REF                     | REF                     | REF                     |
| SGA                                                            | 1.20 (0.99–1.45)                  | 1.10 (0.95–1.27)        | 1.12 (0.99–1.26)        | 1.10 (0.99–1.22)        |

OR = odds ratio; CI = confidence interval; SGA = small for gestational age (i.e. birth weight <10<sup>th</sup> centile for gestational age and sex); REF = reference category

**SUPPLEMENTAL TABLE 4: IMPACT OF THE 9 MARCH COVID-19 MITIGATION MEASURES ON THE INCIDENCE OF PRETERM BIRTH: EFFECT MODIFICATION BY NEONATAL SEX**

| Variable                                                    | Time window around implementation |                         |                         |                         |
|-------------------------------------------------------------|-----------------------------------|-------------------------|-------------------------|-------------------------|
|                                                             | ±1 month<br>OR (95%CI)            | ±2 months<br>OR (95%CI) | ±3 months<br>OR (95%CI) | ±4 months<br>OR (95%CI) |
| COVID-19 mitigation measures                                | 0.86 (0.67–1.11)                  | 0.80 (0.67–0.95)        | 0.86 (0.73–1.00)        | 0.87 (0.75–1.01)        |
| <b>Sex</b>                                                  |                                   |                         |                         |                         |
| Male                                                        | REF                               | REF                     | REF                     | REF                     |
| Female                                                      | 0.87 (0.84–0.90)                  | 0.86 (0.84–0.88)        | 0.85 (0.83–0.86)        | 0.85 (0.83–0.86)        |
| <b>COVID-19 mitigation measures × sex<br/>(interaction)</b> |                                   |                         |                         |                         |
| Male                                                        | REF                               | REF                     | REF                     | REF                     |
| Female                                                      | 0.92 (0.79–1.08)                  | 0.93 (0.83–1.05)        | 0.97 (0.89–1.07)        | 0.95 (0.87–1.03)        |

OR = odds ratio; CI = confidence interval; REF = reference category

**SUPPLEMENTAL TABLE 5: IMPACT OF THE 9 MARCH COVID-19 MITIGATION MEASURES ON THE INCIDENCE OF PRETERM BIRTH: CENSORING OF ONE OR TWO WEEKS PRIOR TO OR FOLLOWING THE MEASURES**

| Period of censoring                | Time window around implementation |                         |                         |                         |
|------------------------------------|-----------------------------------|-------------------------|-------------------------|-------------------------|
|                                    | ±1 month<br>OR (95%CI)            | ±2 months<br>OR (95%CI) | ±3 months<br>OR (95%CI) | ±4 months<br>OR (95%CI) |
| Two weeks prior to implementation  | 1.10 (0.71–1.70)                  | 0.79 (0.63–0.99)        | 0.89 (0.73–1.07)        | 0.89 (0.74–1.07)        |
| One week prior to implementation   | 0.83 (0.62–1.12)                  | 0.80 (0.66–0.96)        | 0.88 (0.75–1.03)        | 0.87 (0.75–1.01)        |
| One week following implementation  | 0.83 (0.64–1.07)                  | 0.78 (0.65–0.93)        | 0.86 (0.73–1.00)        | 0.86 (0.74–0.99)        |
| Two weeks following implementation | 0.82 (0.63–1.07)                  | 0.77 (0.64–0.93)        | 0.86 (0.73–1.01)        | 0.86 (0.73–1.00)        |

OR = odds ratio; CI = confidence interval
